# Supplementary material
Source: publisher site journal article supplement (https://www.dovepress.com/article/462088)
Supplement: Supplementary file 1 [file get_supplementary_file.php]

| Table S1 All the oligonucleotides used in this study | | |
| --- | --- | --- |
| Oligo names | Sequences (5′-3′) | For purposes |
| *LAMP-F3* | TGGACACACCCATCCGT | Amplification of partial *blaKPC* gene using LAMP method. |
| *LAMP-B3* | GGAACGTGGTATCGCCG |
| *LAMP-FIP(F1c/F2)* | ACCGTCATGCCTGTTGTCAGAT-CGGCAAAAATGCGCTGGT |
| *LAMP-BIP(B1c/B2)* | AATACAGTGATAACGCCGCCGC-CGCATGAAGGCCGTCAG |
| *LAMP-LF* | GAGATGGGTGACCACGGA |
| *LAMP-LB* | CAATTTGTTGCTGAAGGAGTTGGGC |
| *RPA-F* | GCCGTGCAATACAGTGATAACGCCGCCGCCA | Amplification of partial *blaKPC* gene using RPA method. |
| *RPA-R* | CAGCCAGTGCAGAGCCCAGTGTCAGTTTTTGTA |
| *PCR-F* | TGTAAGTTACCGCGCTGAGG | Amplification of partial *blaKPC* gene using PCR method. |
| *PCR-R* | GCATAGTCATTTGCCGTGCC |
| *sgRNA* | UAAUUUCUACUAAGUGUAGAUUUGCUGAAGGAGUUGGGCGGCCC | The sgRNA-oligo sequences used for detecting *blaKPC* gene. |
| *F* | CGCGGATCCTGTAAGTTACCGCGCTGAGG | Amplification of partial *blaKPC* gene for recombinant plasmid constraction. |
| *R* | CCGCTCGAGGCATAGTCATTTGCCGTGCC |

| Table S2 The Clinical Strains Verified by Whole-Genome Sequencing | | |
| --- | --- | --- |
| Strain No. | Strain Species | Carbapenemase Genes |
| 1 | *Klebsiella pneumoniae* | *blaOXA-48* |
| 2 | *Klebsiella pneumoniae* | *blaNDM-5* |
| 3 | *Escherichia coli* | *blaNMD-6* |
| 4 | *Klebsiella pneumoniae* | *blaIMP-13* |
| 5 | *Klebsiella pneumoniae* | *blaIMP-17* |
| 6 | *Klebsiella pneumoniae* | *blaVIM-232* |
| 7 | *Klebsiella pneumoniae* | *blaVIM-212* |
| 8 | *Klebsiella pneumoniae* | *blaKPC-2* |
| 9 | *Klebsiella pneumoniae* | *blaKPC-3* |
| 10 | *Klebsiella pneumoniae* | *blaKPC-4* |
| 11 | *Klebsiella pneumoniae* | *blaKPC-5* |
| 12 | *Klebsiella pneumoniae* | *blaKPC-6* |
| 13 | *Klebsiella pneumoniae* | *blaKPC-7* |

| Table S3 Pre-Verified Clinical CRE Strains Tested in This Study | |
| --- | --- |
| Strains | β-Lactamase Genes |
| KPC Carbapenemase producers (40) | |
| *Klebsiella pneumoniae(30)* | *blaKPC-2* |
| *Klebsiella pneumoniae(10)* | *blaKPC-1* |
| Non-KPC Carbapenemase producers (40) | |
| *Enterobacter hormaechei(3)* | *blaNDM* |
| *Citrobacter freundii(2)* | *blaNDM* |
| *Enterobacter cloacae(10)* | *blaNDM* |
| *Klebsiella pneumoniae(4)* | *blaOXA-48* |
| *Klebsiella pneumoniae(2)* | *blaOXA-23* |
| *Klebsiella oxytoca(1)* | *blaOXA-23* |
| *Klebsiella pneumoniae(6)* | *blaCTX-M* |
| *Klebsiella areogenes(1)* | *blaCTX-M* |
| *Klebsiella areogenes(1)* | *blaCTX-M* |
| *Enterobacter cloacae(1)* | *blaCTX-M* |
| *Enterobacter cloacae(2)* | *blaDHA-1* |
| *Klebsiella areogenes(1)* | *blaDHA-1* |
| *Klebsiella pneumoniae(2)* | *blaDHA-1* |
| *Klebsiella pneumoniae(1)* | *blaSHV* |
| *Klebsiella pneumoniae(3)* | *blaIMP-4* |
